# Supplementary material
Source: publisher figshare collection journal article supplement (https://acs.figshare.com/ndownloader/files/8908846)
Supplement: Supplementary file 1 [file 8908846]

## Supporting Information

# Liquid Viscosity and Surface Tension of *n*-Dodecane, *n*-Octacosane, Their Mixtures, and a Wax between 323 and 573 K by Surface Light Scattering (SLS)

*Thomas M. Koller,<sup>\*,a</sup> Tobias Klein,<sup>a</sup> Cédric Giraudet,<sup>a</sup> Jiaqi Chen,<sup>b</sup> Ahmad Kalantar,<sup>b</sup>*

*Gerard P. van der Laan,<sup>b</sup> Michael H. Rausch,<sup>a</sup> and Andreas P. Fröba<sup>a</sup>*

<sup>a</sup> Department of Chemical and Biological Engineering (CBI) and Erlangen Graduate School in  
Advanced Optical Technologies (SAOT), University of Erlangen-Nuremberg, Paul-Gordan-Straße  
6, 91052 Erlangen, Germany

<sup>b</sup> Shell Global Solutions International B.V., Grasweg 31, 1031 HW Amsterdam, The Netherlands

---

\* Author to whom correspondence should be addressed. Tel. +49-9131-85-23279, Fax +49-9131-  
85-25851, E-mail thomas.m.koller@fau.de.

**Table S1. Composition Analysis of the Samples  $n\text{-C}_{12}\text{H}_{26}$ ,  $n\text{-C}_{28}\text{H}_{58}$  and  $0.3n\text{-C}_{12}\text{H}_{26}/0.7n\text{-C}_{28}\text{H}_{58}$  Before ( $w_{\text{before}}$ ) and After ( $w_{\text{after}}$ ) the SLS Measurements Using a GC Method and Additionally a Weighing Procedure in the Case of the Binary Mixture. The Corresponding Mass Fractions  $w_i$  are Given for the Different Groups  $i$ .**

| group $i$                                                                                                                   | $100 \cdot w_{i,\text{before}}$ | $100 \cdot w_{i,\text{after}}$ |
|-----------------------------------------------------------------------------------------------------------------------------|---------------------------------|--------------------------------|
| sample $n\text{-C}_{12}\text{H}_{26}$                                                                                       |                                 |                                |
| $n\text{-C}_{12}\text{H}_{26}$                                                                                              | 99.45 <sup>a</sup>              | 99.41 <sup>a</sup>             |
| $n$ -alkanes with $N_{\text{C}} = 8\text{-}17$ (except $n\text{-C}_{12}\text{H}_{26}$ )                                     | 0.39 <sup>a</sup>               | 0.39 <sup>a</sup>              |
| methyl-branched paraffins with $N_{\text{C}} = 12$                                                                          | 0.10 <sup>a</sup>               | 0.09 <sup>a</sup>              |
| aromatic compounds with $N_{\text{C}} = 12$                                                                                 | 0.02 <sup>a</sup>               | 0.04 <sup>a</sup>              |
| other aromatic components                                                                                                   | 0.02 <sup>a</sup>               | 0.02 <sup>a</sup>              |
| other unknown components                                                                                                    | 0.02 <sup>a</sup>               | 0.01 <sup>a</sup>              |
| oxygenated components                                                                                                       | 0.00 <sup>a</sup>               | 0.02 <sup>a</sup>              |
| sample $n\text{-C}_{28}\text{H}_{58}$                                                                                       |                                 |                                |
| $n\text{-C}_{28}\text{H}_{58}$                                                                                              | 99.50 <sup>a</sup>              | 98.32 <sup>a</sup>             |
| $n$ -alkanes with $N_{\text{C}} = 8\text{-}30$ (except $n\text{-C}_{28}\text{H}_{58}$ )                                     | 0.28 <sup>a</sup>               | 0.40 <sup>a</sup>              |
| olefins with $N_{\text{C}} = 26\text{-}29$                                                                                  | 0.04 <sup>a</sup>               | 0.10 <sup>a</sup>              |
| carbonyls with $N_{\text{C}} = 14\text{-}27$                                                                                | 0.01 <sup>a</sup>               | 0.09 <sup>a</sup>              |
| branched ketones with $N_{\text{C}} = 26\text{-}28$                                                                         | 0.16 <sup>a</sup>               | 0.46 <sup>a</sup>              |
| branched alcohols with $N_{\text{C}} = 27\text{-}28$                                                                        | 0.00 <sup>a</sup>               | 0.64 <sup>a</sup>              |
| sample $0.3n\text{-C}_{12}\text{H}_{26}/0.7n\text{-C}_{28}\text{H}_{58}$                                                    |                                 |                                |
| $n\text{-C}_{12}\text{H}_{26}$                                                                                              | 15.6 <sup>b</sup>               | 14.77 <sup>a</sup>             |
| $n\text{-C}_{28}\text{H}_{58}$                                                                                              | 84.4 <sup>b</sup>               | 84.49 <sup>a</sup>             |
| $n$ -alkanes with $N_{\text{C}} = 10\text{-}30$ (except $n\text{-C}_{12}\text{H}_{26}$ and $n\text{-C}_{28}\text{H}_{58}$ ) | -                               | 0.32 <sup>a</sup>              |
| methyl-branched paraffins with $N_{\text{C}} = 12$                                                                          | -                               | 0.01 <sup>a</sup>              |
| olefin components                                                                                                           | -                               | 0.06 <sup>a</sup>              |
| oxygenated components                                                                                                       | -                               | 0.35 <sup>a</sup>              |

<sup>a</sup>Estimated from GC analysis. The expanded uncertainties  $U$  are  $100 \cdot U(w_i) = 0.1$  (level of confidence = 0.95).

<sup>b</sup>Estimated from the GC results for the two pure  $n$ -alkane samples and from the weighing procedure. The expanded uncertainties  $U$  are  $100 \cdot U(w_i) = 0.2$  (level of confidence = 0.95).

**Table S2. Composition Analysis of the Wax Sample SX-70 Before the SLS Measurements Using a GC Method. The Corresponding Mass Fractions  $w_{N_C}$  are Given for the Different  $n$ -Alkanes with Carbon Number  $N_C$ .<sup>a</sup>**

| $N_C$ | $100 \cdot w_{N_C}$ |
|-------|---------------------|-------|---------------------|-------|---------------------|-------|---------------------|
| 14    | 0.001               | 29    | 4.820               | 44    | 2.006               | 59    | 0.021               |
| 15    | 0.004               | 30    | 5.604               | 45    | 1.557               | 60    | 0.015               |
| 16    | 0.006               | 31    | 6.211               | 46    | 1.184               | 61    | 0.013               |
| 17    | 0.006               | 32    | 6.592               | 47    | 0.889               | 62    | 0.011               |
| 18    | 0.005               | 33    | 6.780               | 48    | 0.662               | 63    | 0.009               |
| 19    | 0.012               | 34    | 6.777               | 49    | 0.486               | 64    | 0.007               |
| 20    | 0.034               | 35    | 6.645               | 50    | 0.358               | 65    | 0.006               |
| 21    | 0.078               | 36    | 6.384               | 51    | 0.261               | 66    | 0.006               |
| 22    | 0.173               | 37    | 6.020               | 52    | 0.192               | 67    | 0.005               |
| 23    | 0.364               | 38    | 5.550               | 53    | 0.139               | 68    | 0.005               |
| 24    | 0.708               | 39    | 5.011               | 54    | 0.105               | 69    | 0.004               |
| 25    | 1.251               | 40    | 4.393               | 55    | 0.075               | 70    | 0.003               |
| 26    | 2.009               | 41    | 3.763               | 56    | 0.052               | >70   | 0.220               |
| 27    | 2.899               | 42    | 3.127               | 57    | 0.039               |       |                     |
| 28    | 3.880               | 43    | 2.533               | 58    | 0.030               |       |                     |

<sup>a</sup>Estimated from GC analysis. The expanded uncertainties  $U$  are  $100 \cdot U(w_{N_C}) = 0.1$  (level of confidence = 0.95).

**Table S3. Liquid Density  $\rho'$  of the Wax SX-70 as a Function of Temperature  $T$  at Atmospheric Pressure Obtained from Volumetric Measurements.<sup>a</sup>**

| $T$    | $\rho'$            |
|--------|--------------------|
| K      | kg·m <sup>-3</sup> |
| 363.15 | 786.35             |
| 383.15 | 777.70             |
| 403.15 | 767.65             |
| 423.15 | 756.50             |

<sup>a</sup>The expanded uncertainties  $U$  are  $U(T) = 0.1$  K and the relative expanded uncertainty  $U_r$  are  $U_r(\rho') = 0.002$  (level of confidence = 0.95).

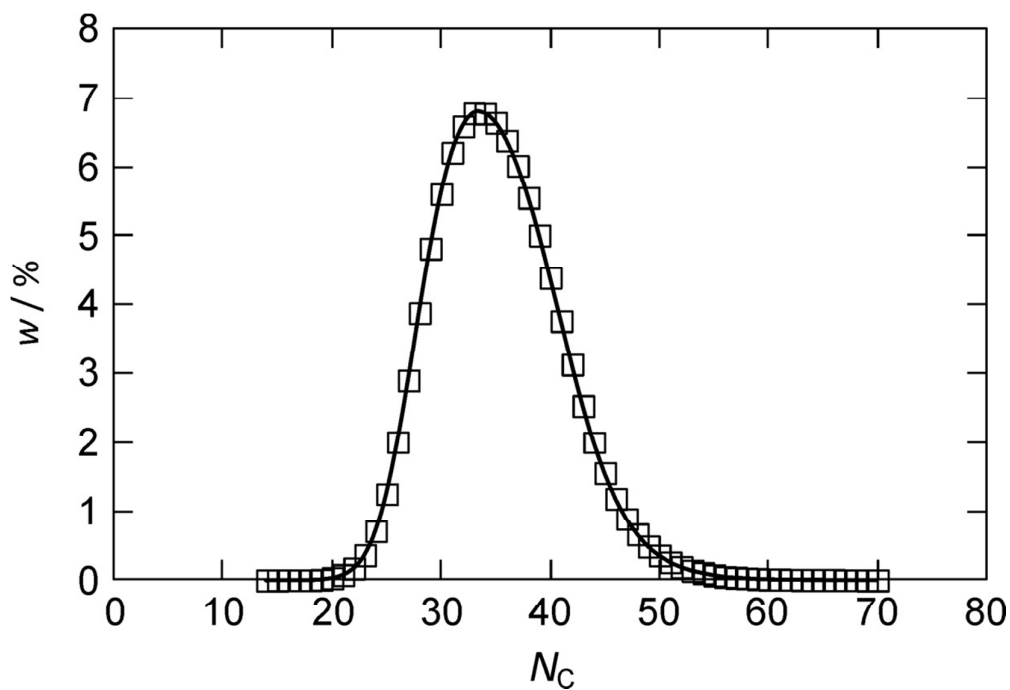

**Figure S1.** Composition analysis of the wax sample SX-70 before the SLS measurements using a GC method. The mass fraction data related to the  $n$ -alkanes with carbon number  $N_C$  are given as data points and refer to the values given in Table S1. The line serves as guide for the eye.
